# Supplementary material for: Nitrogen-enriched, ordered mesoporous carbons for potential electrochemical energy storage
Source: Royal Society of Chemistry journal article supplement (doi:10.1039/c5ta09073c), 2016-01-01
Supplement: c5ta09073c1.pdf [file c5ta09073c1.pdf]

### Supporting information

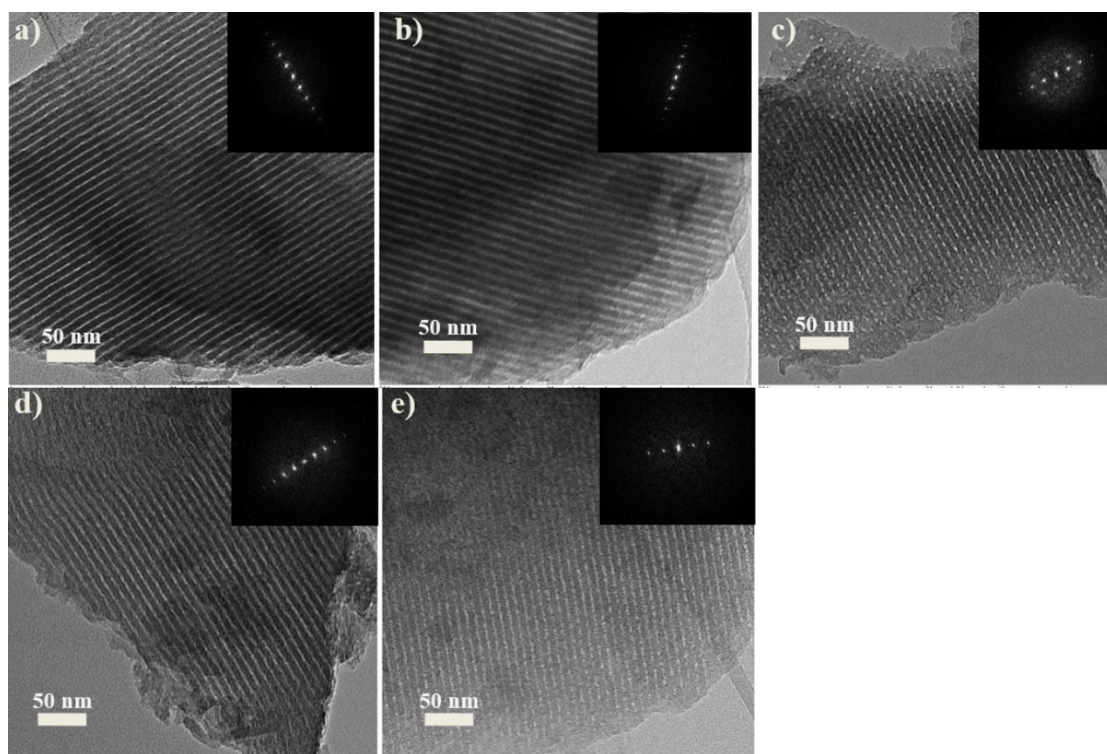

**Fig. S1** TEM images of OMC (a), N-OMC-1 (b), N-OMC-2 (c), N-OMC-3 (d) and N-OMC-5 (e) viewed along the [110]. The insets are the corresponding Fast Fourier Transformations (FFT) diffractograms.

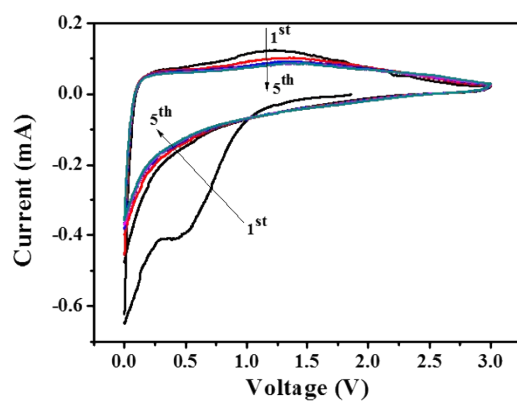

**Fig. S2** Cyclic voltammograms of the N-OMC-4 anode for the initial five cycles.

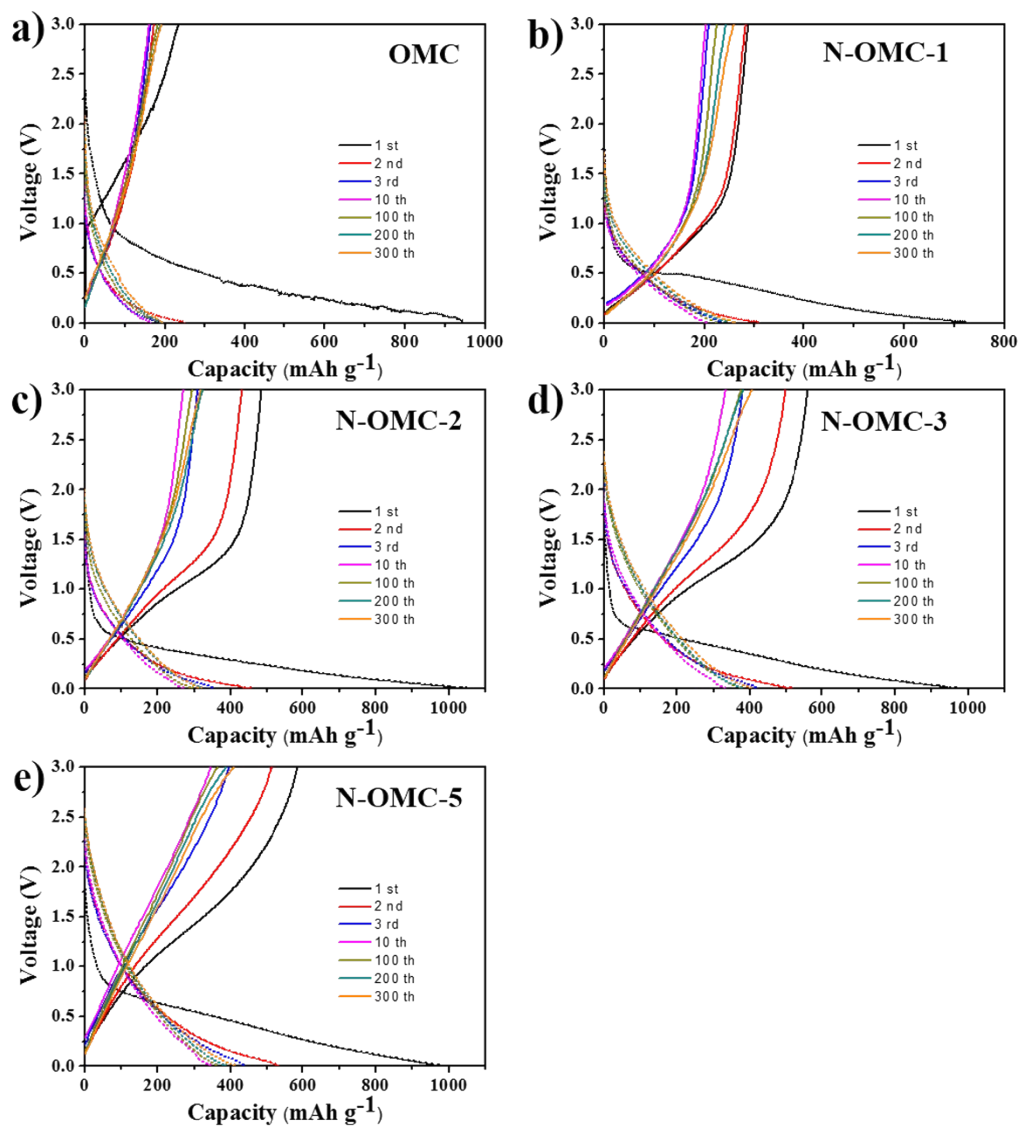

**Fig. S3** The galvanostatic charge/discharge curves of OMC, N-OMC-1, N-OMC-2, N-OMC-3 and N-OMC-5 at a cycling rate of  $100 \text{ mA g}^{-1}$  for the 1<sup>st</sup>, 2<sup>nd</sup> and  $300 \text{ mA g}^{-1}$  for the subsequent cycles.

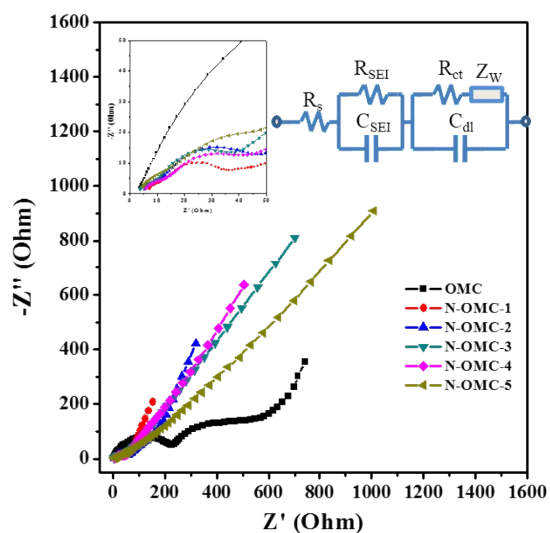

**Fig. S4** Nyquist plots of OMC and N-OMCs. Inset: the magnified Nyquist plots (left); equivalent circuit (right).  $R_s$ ,  $R_{SEI}$ ,  $C_{SEI}$ ,  $R_{ct}$ ,  $C_{dl}$  and  $Z_W$  represent the electrolyte resistance, the resistance and capacitance of the SEI film, the charge transfer resistance, the double layer capacitance and the Warburg impedance, respectively.

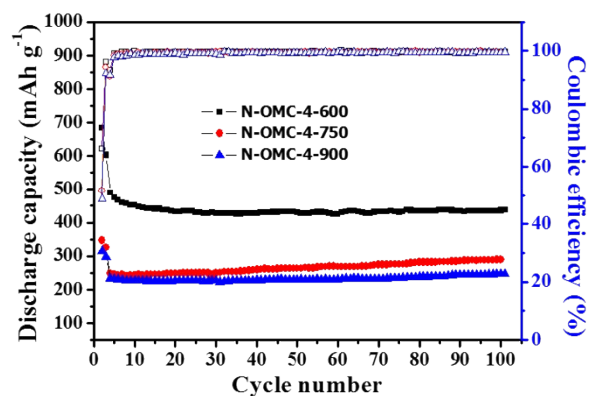

**Fig. S5** Cycle performances and coulombic efficiency of N-OMC-4-X (X = 600, 750, 900).

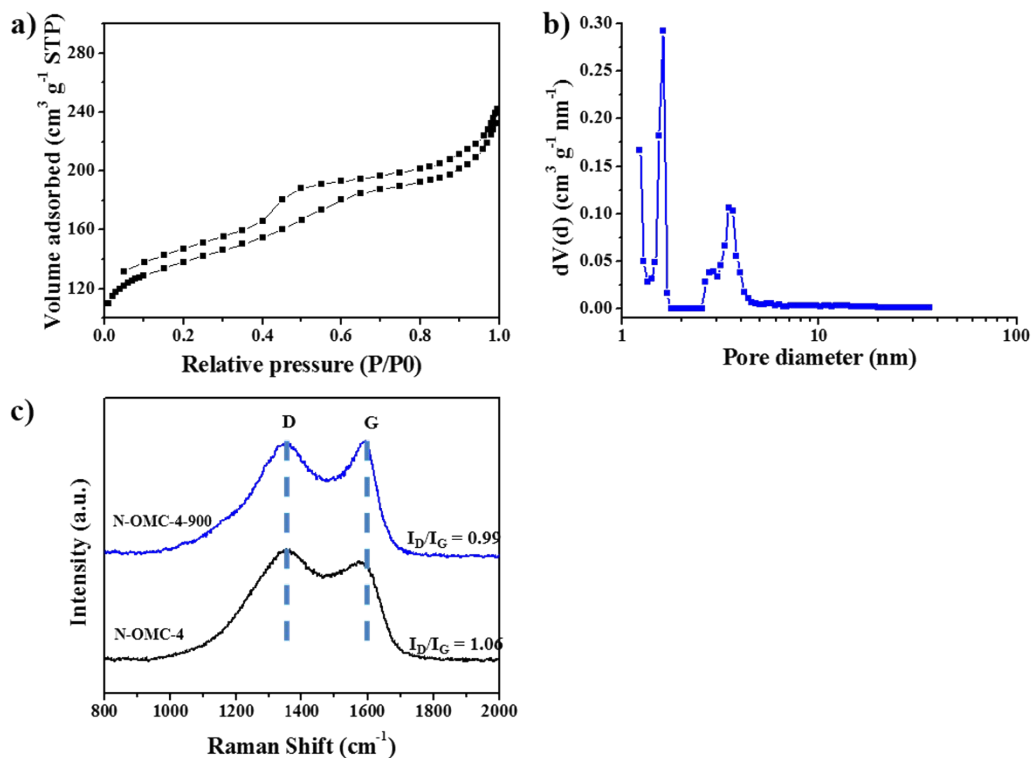

**Fig. S6** Nitrogen adsorption-desorption isotherm (a) and the corresponding pore size distribution (b) for N-OMC-4-900; Raman spectra (c) of N-OMC-4 and N-OMC-4-900.

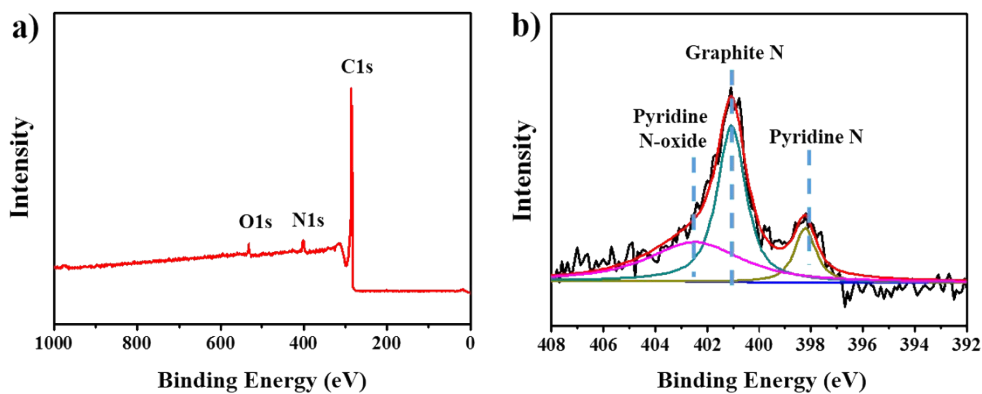

**Fig. S7** XPS survey spectrum (a) and N1s spectrum (b) of N-OMC-4-900.

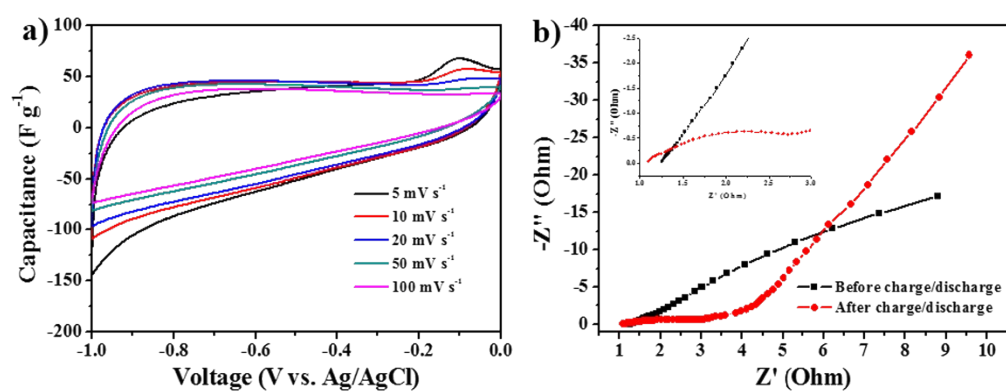

**Fig. S8** Electrochemical performance of N-OMC-4-900 electrode: Cyclic voltammograms at different scan rates in 6 M KOH (a), Nyquist plots before and after charge and discharge under open-circuit voltage (b).

**Table S1** Nitrogen contents of OMC and N-OMC-X (X = 1-5) from Elemental Analysis (EA) and corresponding nitrogen species concentration calculated by XPS.

|                  | OMC | N-OMC-1 | N-OMC-2 | N-OMC-3 | N-OMC-4 | N-OMC-5 |
|------------------|-----|---------|---------|---------|---------|---------|
| Total N (wt%)    | -   | 6.29    | 12.84   | 19.94   | 24.40   | 31.66   |
| Pyridinic N (%)  | -   | -       | 12.0    | 18.9    | 31.4    | 40.6    |
| Pyridinic N (%)  | -   | 41.4    | 33.0    | 30.8    | 26.0    | 29.1    |
| Pyrrolic N (%)   | -   | 28.1    | 55.0    | 50.3    | 42.6    | 30.3    |
| Quaternary N (%) | -   | 30.5    | -       | -       | -       | -       |

**Table S2** Comparison of the electrochemical performance of N-OMC-4 and other reported OMCs and N-doped Carbons.

| Sample                       | Condition               | Specific capacity<br>(mAh g <sup>-1</sup> ) (cycles) | Ref.      |
|------------------------------|-------------------------|------------------------------------------------------|-----------|
| CMK-3                        | 100 mA g <sup>-1</sup>  | 850-1100 (20)                                        | 1         |
| OMC-100                      | 0.2 C                   | 178 (100)                                            | 2         |
| OMC-3                        | 100 mA g <sup>-1</sup>  | 1012 (100)                                           | 3         |
| Tri-OMC                      | 50 mA g <sup>-1</sup>   | 500 (50)                                             | 4         |
| CMK-3                        | 100 mA g <sup>-1</sup>  | 356 (100)                                            | 5         |
| CMK-8                        | 100 mA g <sup>-1</sup>  | 569 (100)                                            | 5         |
| N-rich mesoporous<br>carbons | 0.1 mA cm <sup>-2</sup> | 1200 (100)                                           | 6         |
| HN-CNTs                      | 100 mA g <sup>-1</sup>  | 494 (100)                                            | 7         |
| CN <sub>X</sub> -NTs         | 0.1 C                   | 311.6 (30)                                           | 8         |
| N-OMC-4                      | 300 mA g <sup>-1</sup>  | 505 (300)                                            | This work |

**Table S3** Kinetic parameters of OMC and N-OMCs.

| Sample                            | OMC   | N-OMC-1 | N-OMC-2 | N-OMC-3 | N-OMC-4 | N-OMC-5 |
|-----------------------------------|-------|---------|---------|---------|---------|---------|
| R <sub>s</sub> (Ω) <sup>a</sup>   | 2.9   | 2.4     | 4.3     | 2.5     | 4.2     | 3.2     |
| R <sub>SEI</sub> (Ω) <sup>b</sup> | 240.1 | 14.1    | 17.3    | 13.6    | 16.4    | 22.7    |
| R <sub>ct</sub> (Ω) <sup>c</sup>  | 173.9 | 37.4    | 51.2    | 46.3    | 46.9    | 92.9    |

<sup>a</sup> R<sub>s</sub> = solution resistance, <sup>b</sup> R<sub>SEI</sub> = SEI resistance, <sup>c</sup> R<sub>ct</sub> = charge transfer resistance.

**Table S4** Textural parameters of N-OMC-4-900 based on nitrogen physisorption.

| Sample      | S <sub>BET</sub> <sup>a</sup><br>(m <sup>2</sup> g <sup>-1</sup> ) | S <sub>micro</sub> <sup>b</sup><br>(m <sup>2</sup> g <sup>-1</sup> ) | V <sub>total</sub> <sup>c</sup><br>(cm <sup>3</sup> g <sup>-1</sup> ) | V <sub>micro</sub> <sup>d</sup><br>(cm <sup>3</sup> g <sup>-1</sup> ) | D <sup>e</sup><br>(nm) |
|-------------|--------------------------------------------------------------------|----------------------------------------------------------------------|-----------------------------------------------------------------------|-----------------------------------------------------------------------|------------------------|
| N-OMC-4-900 | 513                                                                | 282                                                                  | 0.37                                                                  | 0.11                                                                  | 2.9                    |

## References

1. H. Zhou, S. Zhu, M. Hibino, I. Honma and M. Ichihara, *Adv. Mater.*, 2003, **15**, 2107.
2. A. F. Leonard, C. J. Gommers, M. L. Piedboeuf, J. P. Pirard and N. Job, *Microporous Mesoporous Mater.*, 2014, **195**, 92.
3. M.-S. Kim, D. Bhattacharjya, B. Fang, D.-S. Yang, T.-S. Bae and J.-S. Yu, *Langmuir*, 2013, **29**, 6754.
4. H.-Q. Li, R.-L. Liu, D.-Y. Zhao and Y.-Y. Xia, *Carbon*, 2007, **45**, 2628.
5. D. Saikia, T.-H. Wang, C.-J. Chou, J. Fang, L.-D. Tsai and H.-M. Kao, *RSC Adv.*, 2015, **5**, 42922.
6. Y. Mao, H. Duan, B. Xu, L. Zhang, Y. Hu, C. Zhao, Z. Wang, L. Chen and Y. Yang, *Energy Environ. Sci.*, 2012, **5**, 7950.
7. X. Li, J. Liu, Y. Zhang, Y. Li, H. Liu, X. Meng, J. Yang, D. Geng, D. Wang, R. Li and X. Sun, *J. Power Sources*, 2012, **197**, 238.
8. W. Ren, D. Li, H. Liu, R. Mi, Y. Zhang, L. Dong and L. Dong, *Electrochim. Acta*, 2013, **105**, 75.
